# Supplementary material
Source: PubMed Central journal article supplement (PMC8799904)
Supplement: web_material_kwab170.pdf [file web_material_kwab170.pdf]

---

STRENGTHENING HEALTH SERVICES RESEARCH USING TARGET TRIAL EMULATION: AN  
APPLICATION TO VOLUME-OUTCOMES STUDIES

---

**Arn L. Madenci, Kerollos Nashat Wanis, Zara Cooper, Sebastien Haneuse, SV Subramanian,**

**Albert Hofman, and Miguel A. Hernán**

**Web Appendix**

|                                                                            |   |
|----------------------------------------------------------------------------|---|
| Web Appendix 1: Assignment mechanism for Target Trials #3 and #4 . . . . . | 2 |
| Web Appendix 2: Inverse probability weights . . . . .                      | 2 |
| Web Appendix 3: Sensitivity analysis . . . . .                             | 3 |
| Treatment weights . . . . .                                                | 3 |
| Censoring weights . . . . .                                                | 3 |
| Standardization . . . . .                                                  | 3 |
| Web Appendix 4: Consideration of positivity violations . . . . .           | 4 |
| Web Tables . . . . .                                                       | 4 |

### Web Appendix 1: Assignment mechanism for Target Trials #3 and #4

Surgeons who performed fewer operations than the median volume of all surgeons during the pre-baseline interval (denoted by  $\tilde{\mu}$ ) are assigned to add to their volume by  $x$  cases (as in prior trials). For many surgeons with pre-baseline volume  $w < \tilde{\mu}$ , they will not be able to fully add to their volume when  $x < -1$  and  $|x| > w$ ; as such, each surgeon  $j$  is assigned to perform  $A_j = \max(0, w_j + x)$  as in trials #1 and #2. For surgeons with  $w \geq \tilde{\mu}$  and  $x \geq -1$ , they are assigned to perform  $w - x$  operations. However, for surgeons with  $w \geq \tilde{\mu}$  and  $x < -1$ , fewer than  $x$  cases will be available for each surgeon; specifically, only  $\sum_{j:w_j < \tilde{\mu}} w_j - a_j < x \sum_{j=0}^J \mathbb{1}(w_j < \tilde{\mu})$  cases will be available. As such, when  $x < -1$ , surgeons with  $w \geq \tilde{\mu}$  are randomly assigned to a volume  $w_j - a_j$  for a randomly selected surgeon  $j$  with  $w < \tilde{\mu}$  such that the net number of operations will remain fixed at the pre-baseline level.

In summary, for intervention arm  $x$  and pre-baseline volume  $w_{(1)}, \dots, w_{(J)}$  in ascending order with surgeons  $j \in \{1, \dots, J\}$ , each surgeon's operative volume assignment will be

$$A_j = \begin{cases} \max(w_j + x, 0) & \text{if } w_j < \tilde{\mu} \\ \max(w_j - x, 0) & \text{if } w_j \geq \tilde{\mu} \text{ and } x \geq -1 \\ n_m & \text{if } w_j \geq \tilde{\mu} \text{ and } x < -1 \end{cases} \quad (1)$$

where  $n_m$  for  $m \in \{\lceil J/2 \rceil + 1, \dots, J\}$  is defined by the following:

Let  $\mathbf{k} = k_1, \dots, k_{\lceil J/2 \rceil} = w_1 - a_1, \dots, w_{\lceil J/2 \rceil} - a_{\lceil J/2 \rceil}$  and  $\mathbf{k}^*$  be a random permutation of  $\mathbf{k}$  :  $k_1^* = k_{\pi(1)}, \dots, k_{\lceil J/2 \rceil}^* = k_{\pi(\lceil J/2 \rceil)}$ .

Then define  $\mathbf{n} = \mathbf{k}^* = k_{\pi(1)}^*, \dots, k_{\pi(\lceil J/2 \rceil)}^*$ .

### Web Appendix 2: Inverse probability weights

This section describes the estimation of stabilized inverse probability weights used in the main analysis:

$$SW = SW^A \cdot SW^C$$

$$SW^A = \prod_{k=0}^K \frac{f(A_k | A_{k-1}, V)}{f(A_k | A_{k-1}, \bar{L}_{k-1}, V)}$$

where  $f(A_k | A_{k-1}, \bar{L}_{k-1}, V)$  is the conditional probability mass function  $f_{A_k | A_{k-1}, \bar{L}_{k-1}, V}(a_k | a_{k-1}, \bar{l}_{k-1}, v)$  evaluated at the random expression  $A_k | A_{k-1}, \bar{L}_{k-1}, V$  and, as described in the main text,  $A$  is the sum of baseline volume  $W$  and assignment  $X$ .

Additionally, because a one-interval deviation is permitted, the numerator and denominator are deterministically equal to 1 in the first interval  $k = 0$  following consecutive adherence to the randomized assignment (all individuals are by convention considered to be adherent during interval  $k = -1$ ).

To estimate the quantities in the numerator and denominator, under the assumption that the operative volume of a surgeon in any given interval ( $A_k$ ) is a negative binomial random variable with non-constant dispersion, we fit the following discrete-time regressions:

$$\hat{\mathbb{E}}[A_k | A_{k-1}, V] = \exp(\theta_{0,k} + \theta_1^T h(a_k) + \theta_2^T V) \quad (2)$$

$$\hat{\mathbb{E}}[A_k | A_{k-1}, \bar{L}_{k-1}, V] = \exp(\theta_{0,k} + \theta_1^T h(a_k) + \theta_3^T \bar{l}_k + \theta_4 V) \quad (3)$$

where  $\theta_{.,k} = \theta^T g(k)$  is a time-varying parameter and the overbar denotes a variable's history in the prior interval. The dispersions for Equations (2) and (3) are separately modeled using the same covariates, using gamma regression. Surgeon-specific mean and dispersion predictions for the numerator and denominator equations are then used to generate negative binomial distributions with which corresponding probabilities can be computed for each surgeon-specific observed value of  $A_k$ .

Finally, only surgeons who perform one or more operations during interval  $K + 1$  will have measurable outcomes during that interval. To account for this potential selection bias, the following stabilized censoring weights can be used:

$$SW^C = \frac{p(C_{K+1} = 0 | A_K, V)}{p(C_{K+1} = 0 | A_K, \bar{L}_K, V)}$$

where  $C_{K+1}$  denotes censoring in interval  $K + 1$ . The numerator and denominator of the weights can be estimated with the following discrete-time logistic regressions:

$$\begin{aligned} \hat{p}(C_{K+1} = 0 | A_K = a_K, V = v) &= \text{expit}(\theta_0 + \theta_1^T h(a_k) + \theta_2^T v) \\ \hat{p}(C_{K+1} = 0 | A_K = a_K, \bar{L}_K = \bar{l}_K, V = v) &= \text{expit}(\theta_0 + \theta_1^T h(a_k) + \theta_2^T \bar{l}_t + \theta_4 v) \end{aligned}$$

### Web Appendix 3: Sensitivity analysis

This section describes the estimation of stabilized inverse probability weights used in the main analysis:

$$SW = SW_K^A \cdot SW_{K+1}^C$$

#### Treatment weights

$$SW_t^A = \prod_{k=1}^t \frac{f(A_k | A_{k-1}, V, C_k = 0)}{f(A_k | A_{k-1}, \bar{L}_{k-1}, V, C_k = 0)} \quad (4)$$

We fit the same discrete-time regressions for the numerator and denominator as in the main analysis, now conditional on not having been censored ( $\bar{C}_k = 0$ ) for deviating from the assignment a second time or performing zero operations in period  $k$ .

$$\mathbb{E}[A_k | A_{k-1}, V, \bar{C}_k = 0] = \exp(\theta_{0,k} + \theta_1^T g(A_{k-1}) + \theta_2^T V) \quad (5)$$

$$\mathbb{E}[A_k | A_{k-1}, V, \bar{L}_{k-1}, \bar{C}_k = 0] = \exp(\theta_{0,k} + \theta_1^T g(A_{k-1}) + \theta_2^T \bar{L}_k + \theta_3^T V) \quad (6)$$

where  $\theta_{.,k} = \theta_{.}^T g(k)$  is a time-varying parameter,  $g(\cdot)$  is a flexible function such as restricted cubic splines, and the overbar denotes a variable's history including the previous interval.

#### Censoring weights

After following the regime in each interval  $k$ , only surgeons who perform one or more operations during interval  $k + 1$  will have measurable outcomes during that interval. To account for this censoring, the following weights were used:

$$SW_t^C = \prod_{k=1}^t \frac{f(C_k | A_k, V, C_{k-1} = 0)}{f(C_k | A_k, \bar{L}_k, V, C_{k-1} = 0)} \quad (7)$$

The numerator and denominator of the surgeon-specific censoring weights were estimated with the following discrete-time logistic regression equations:

$$\mathbb{E}[C_k | V] = \exp(\theta_{0,k} + \theta_1 A_{k-1} + \theta_2^T V) \quad (8)$$

$$\mathbb{E}[C_k | A_{k-1}, \bar{L}_{k-1}, V] = \exp(\theta_{0,k} + \theta_1 A_{k-1} + \theta_2^T \bar{L}_{k-1} + \theta_4^T V) \quad (9)$$

#### Standardization

As described above, the time-fixed covariates were included in the numerators of the stabilized weights. These variables can be adjusted for using the following outcome regression, weighted by  $SW$ :

$$\mathbb{E}[\pi | X = x] = \sum_{w \in W, v \in V} \mathbb{E}(\pi | X = x, W, V) p(W = w, V = v) \quad (10)$$

$$= \hat{\mathbb{E}}_{w \in W, v \in V} \mathbb{E}[\pi | X = x, W, V] \quad (11)$$

$$= \hat{\mathbb{E}}_{w \in W, v \in V} \text{expit}(\alpha_0 + \alpha_1 g(X) + \alpha_2^T V + \alpha_3^T W) \quad (12)$$

Interaction terms were additionally included between the intervention arm and all time-fixed covariates.

**Web Appendix 4: Consideration of positivity violations**

In the Medicare data, eligible surgeons were observed to perform between 0 and 59 operations per interval. Among surgeons with a pre-baseline operative volume of 0-4, very few were observed to perform higher numbers of operations in the following interval. Conversely, among surgeons with a pre-baseline operative volume of 15 or greater, very few were observed to perform lower numbers of operations in the following interval. A summary of observed operative volumes for different pre-baseline operative volume histories is reported in Appendix Table ???. Given this concern for non-random violations of positivity in the available observed data (especially when including other covariate patterns), we did not consider this trial further. These problems were magnified with a static sustained regime.

**Web Tables**

**Web Table 1:** International Classification of Diseases (ICD) Codes

| ICD code | Revision version | Description                                    |
|----------|------------------|------------------------------------------------|
| 361      | ICD-9            | Bypass anastomosis for heart revascularization |
| 362      | ICD-9            | Heart revascularization by arterial implant    |
| 02100    | ICD-10           | Bypass coronary artery, one artery             |
| 02110    | ICD-10           | Bypass coronary artery, two arteries           |
| 02120    | ICD-10           | Bypass coronary artery, three arteries         |
| 02130    | ICD-10           | Bypass coronary artery, four or more arteries  |

**Web Table 2:** Example of expanded dataset and artificial censoring for emulation of Target Trial #2 (arms  $x = 1$  and  $x = 2$  shown;  $K = 3$ ). Gray shading indicates intervals prior to eligibility assessment.

| Surgeon ID.clone | Arm     | Interval | Operative volume | Change from pre-baseline volume ( $x$ ) | Mortality proportion | Artificial censoring |
|------------------|---------|----------|------------------|-----------------------------------------|----------------------|----------------------|
| #1.1             | -       | -2       | 3                | -                                       | 1/3                  | 0                    |
| #1.1             | -       | -1       | 1                | -                                       | 0/1                  | 0                    |
| #1.1             | $x = 1$ | 0        | 2                | 1                                       | 1/2                  | 0                    |
| #1.1             | $x = 1$ | 1        | 2                | 1                                       | 0/2                  | 0                    |
| #1.1             | $x = 1$ | 2        | 2                | 1                                       | 0/2                  | 0                    |
| #1.1             | $x = 1$ | 3        | 2                | 1                                       | 0/2                  | 0                    |
| #1.1             | $x = 1$ | 4        | 6                | 5                                       | 2/6                  | 0                    |
| #1.2             | -       | -2       | 3                | -                                       | 1/3                  | 0                    |
| #1.2             | -       | -1       | 1                | -                                       | 0/1                  | 0                    |
| #1.2             | $x = 2$ | 0        | 2                | 1                                       | 1/2                  | 0                    |
| #1.2             | $x = 2$ | 1        | 2                | 1                                       | 0/2                  | 1                    |
| #3.1             | -       | -2       | 5                | -                                       | 1/5                  | 0                    |
| #3.1             | -       | -1       | 2                | -                                       | 0/2                  | 0                    |
| #3.1             | $x = 1$ | 0        | 3                | 1                                       | 1/3                  | 0                    |
| #3.1             | $x = 1$ | 1        | 0                | -2                                      | 0                    | 0                    |
| #3.1             | $x = 1$ | 2        | 3                | 1                                       | 0/3                  | 0                    |
| #3.1             | $x = 1$ | 3        | 1                | -1                                      | 0/1                  | 1                    |
| #3.2             | -       | -2       | 5                | -                                       | 1/5                  | 0                    |
| #3.2             | -       | -1       | 2                | -                                       | 0/2                  | 0                    |
| #3.2             | $x = 2$ | 0        | 3                | 1                                       | 1/3                  | 0                    |
| #3.2             | $x = 2$ | 1        | 0                | 1                                       | 0                    | 1                    |

\* Among patients who underwent an operation during the current interval.

**Web Table 3:** Positivity check for Target Trial #1

| Volume category | History: 0 to 4 | History: 5 to 9 | History: 10 to 14 | History: 15+ |
|-----------------|-----------------|-----------------|-------------------|--------------|
| -5              | 0               | 647             | 510               | 352          |
| -4              | 174             | 889             | 533               | 311          |
| -3              | 521             | 1288            | 587               | 318          |
| -2              | 1104            | 1496            | 611               | 284          |
| -1              | 1750            | 1493            | 592               | 238          |
| 0               | 1736            | 1486            | 521               | 246          |
| 1               | 1689            | 1327            | 499               | 193          |
| 2               | 1298            | 1051            | 383               | 176          |
| 3               | 982             | 867             | 309               | 157          |
| 4               | 695             | 616             | 276               | 118          |
| 5               | 456             | 454             | 193               | 93           |

**Web Table 4:** Positivity check for Target Trial #2

| Volume category | History: 0 to 4 | History: 5 to 9 | History: 10 to 14 | History: 15+ |
|-----------------|-----------------|-----------------|-------------------|--------------|
| -5              | 0               | 161             | 17                | 6            |
| -4              | 136             | 59              | 16                | 11           |
| -3              | 199             | 66              | 18                | 4            |
| -2              | 349             | 93              | 19                | 8            |
| -1              | 506             | 89              | 6                 | 4            |
| 0               | 176             | 83              | 15                | 4            |
| 1               | 131             | 44              | 13                | 3            |
| 2               | 102             | 37              | 10                | 2            |
| 3               | 38              | 25              | 3                 | 1            |
| 4               | 24              | 11              | 1                 | 4            |
| 5               | 21              | 8               | 2                 | 0            |

**Web Table 5:** Mortality estimates for sensitivity analysis of Target Trial #2 (IPW)

| Change in volume | 90-day mortality (%) |
|------------------|----------------------|
| -5               | 6.8 (4.6-10.4)       |
| -4               | 6.9 (5.4-8.9)        |
| -3               | 6.8 (5.6-8.8)        |
| -2               | 6.7 (5.4-8.7)        |
| -1               | 6.6 (5.4-8.1)        |
| 0                | 6.3 (5.5-7.2)        |
| 1                | 5.9 (5.0-7.0)        |
| 2                | 5.6 (4.5-6.8)        |
| 3                | 5.2 (4.3-6.3)        |
| 4                | 4.9 (3.7-6.3)        |
| 5                | 4.5 (2.8-7.2)        |
